# Supplementary material for: Sequential combination of micro-FTIR imaging spectroscopy and pyrolysis-GC/MS for microplastic quantification. Application to river sediments
Source: Royal Society of Chemistry journal article supplement (doi:10.1039/d5ay00237k), 2025-01-01
Supplement: d5ay00237k1.xlsx [file d5ay00237k1.xlsx]

## Sheet: Sequence 1
	PE Weighed mass (μg)	Ratio C19 alkene/PS-d5	Outlier		PE			PP Weighed mass (μg)	Ratio DM-C7/PS-d5	Outlier		PP			PS Weighed mass (μg)	Ratio Styrene dimer/PS-d5	Outlier		PS
	0.58586	0.0547649			a	0.29099		0.264482	0.667797			a	4.4893		0.0417122	0.0432122			a	0.259598
	0.251596	0.025417			b	-0.149454		2.59314	9.17487			b	0.562152		0.0834245	0.0304772			b	0.0248038
	0.360621	0.0429408						3.48332	14.6372						0.119575	0.0662363
	3.85904	0.561117						0.311669	1.39065						0.19426	0.0591026
	0.799117	0.116666						0.367975	1.66632						0.264972	0.0965653
	0.941688	0.148931						0.0416351	0.205813						0.312246	0.0870423
	1.11182	0.176629						4.41221	22.4208						0.368657	0.105356
	0.125798	0.0215432						2.1287	10.9866						0.426528	0.143211
	2.45575	0.453892						0.119354	0.797044						0.426528	0.215166
	5.14539	1.06085						0.427057	2.9032						0.814281	0.287892
	1.29033	0.276943						0.0832702	0.708468						1.27958	0.392086
	1.28635	0.288654						0.812776	7.0901						2.13264	0.531513
	7.83502	1.84686						0.42574	3.78169						2.59794	0.518916
	13.3312	3.64047						0.193901	1.76539						3.48978	0.905443
	6.43174	1.81795						1.27722		11.7663					4.42038	1.29587
	10.5247	3.46834						1.70296		16.9352					1.70611		0.733845

## Sheet: Sequence 2
	PE Weighed mass (μg)	Ratio C19 alkene/PS-d5	Outlier		PE			PP Weighed mass (μg)	Ratio DM-C7/PS-d5	Outlier		PP			PS Weighed mass (μg)	Ratio Styrene dimer/PS-d5	Outlier		PS
	0.156948	0.00572039			a	0.260655		2.08999		2.15914		a	3.11208						a	0.168245
	0.382186	0.0405914			b	-0.0904075		1.35463	1.78268			b	-0.315342		2.09387		0.260198		b	0.0184488
	2.68963	0.642533						0.42574	0.611358						0.891832	0.211595
	9.00443	2.20421						0.381457	1.34346						1.35713	0.322873
	11.1094	2.91835						0.220468	0.819624						0.426528	0.116591
	7.71808	2.21145						3.67684	14.6987						0.052041	0.014291
	1.28635	0.184082						0.296997	1.66546						0.382163	0.0496003
	0.814692	0.120143						0.0519448	0.292744						0.270136	0.0405175
	1.03873	0.165379						0.890183	1.82261						0.297547	0.0465995
	1.15255	0.191333						2.55444	5.41799						2.9857	0.475309
	0.666131	0.11227						0.269637	0.668532						3.68365	0.596828
	6.31479	1.08623						2.98018	7.39498						0.220876	0.0393803
	0.897359	0.165007						0.126491	0.32352						2.55917	0.514139
	0.248002	0.0457481						0.343787	0.991645						0.0822327	0.0173797
	4.09292	0.950746						0.0820807	0.246939						0.344424	0.0750241
															0.126726	0.0145077

## Sheet: Py-GC-MS concentrations
						Py-GC/MS MASS MEASUREMENTS			CONCENTRATIONS
Sequence	Sub-sample ID	Py-Aliquote ID	Sample mass (g)	% Injected	Mass extrapolation (mg)	Mass PE (μg)	Mass PP (μg)	Mass PS (μg)	PE (μg/g)	PP (μg/g)	PS (μg/g)
S2	YCE	YCE-R1	9.5	0.10333	0.981637	0.657531	0.169025	0.0762228	0.66983	0.172187	0.0776487
S2	YCE	YCE-R2	9.5	0.11309	1.07435	0.482484	0.176332	0.0663857	0.449093	0.164129	0.0617914
S2	YCE	YCE-R3	9.5	0.103492	0.983175	0.461205	0.218213	0.105567	0.469097	0.221947	0.107373
S2	SSM-01	SSM-01-R1	10.4	0.0994383	1.03416	0.663546	0.197606	0.126319	0.641629	0.191079	0.122147
S2	SSM-01	SSM-01-R2	10.4	0.107619	1.11924	0.627395	0.155047	0.0374336	0.560556	0.138529	0.0334456
S2	SSM-01	SSM-01-R3	10.4	0.102637	1.06743	0.598327	0.142132	0.0220264	0.560532	0.133153	0.020635
S2	SSM-02	SSM-02-R1	10.9	0.103539	1.12858	1.0439	0.346882	0.145767	0.924969	0.307363	0.12916
S2	SSM-02	SSM-02-R2	10.9	0.104002	1.13362	0.977522	0.203489	0.104593	0.862301	0.179503	0.0922649
S2	SSM-02	SSM-02-R3	10.9	0.103724	1.13059	1.16115	0.402266	0.0719692	1.02702	0.3558	0.0636561
S2	EAR	EAR-R1	12.1	0.0338088	0.409087	5.25275	0.827948	2.1913	12.8402	2.02389	5.35657
S2	EAR	EAR-R2	12.1	0.0321364	0.388851	6.49543	0.562163	2.45138	16.7042	1.44571	6.30418
S2	EAR	EAR-R3	12.1	0.029759	0.360084	5.45075	0.625188	2.16847	15.1375	1.73623	6.02213
S2	EAR	EAR-R4	12.1	0.0331858	0.401548	4.57079	0.356274	2.28002	11.3829	0.887251	5.67808
S2	EAR	EAR-R5	12.1	0.0283981	0.343617	5.69007	0.426675	2.26334	16.5593	1.24172	6.5868
S2	EAR	EAR-R6	12.1	0.0323168	0.391033	5.55937	0.580917	1.89895	14.2171	1.4856	4.85624
S2	EAR	EAR-R7	12.1	0.033776	0.40869	6.1182	0.506113	1.93943	14.9703	1.23838	4.74547
S2	EAR	EAR-R8	12.1	0.0313002	0.378733	5.01339	0.462007	1.79671	13.2373	1.21988	4.74401
S2	SPT-01	SPT-01-R1	12	0.107232	1.28679	2.7381	0.459326	0.362426	2.12786	0.356956	0.281652
S2	SPT-01	SPT-01-R2	12	0.0995451	1.19454	1.9318	0.297818	0.785048	1.61719	0.249315	0.657196
S2	SPT-01	SPT-01-R3	12	0.101069	1.21283	1.59428	0.293443	0.494718	1.31452	0.241949	0.407905
S2	SPT-02	SPT-02-R1	10.7	0.0822897	0.8805	2.8416	0.376273	1.25591	3.22726	0.42734	1.42636
S2	SPT-02	SPT-02-R2	10.7	0.086215	0.9225	3.19295	0.414164	1.16663	3.46119	0.448958	1.26464
S2	SPT-02	SPT-02-R3	10.7	0.0832944	0.89125	3.0006	0.588848	1.31039	3.36673	0.660699	1.47028
S2	SPT-02	SPT-02-R4	10.7	0.0807477	0.864	3.23056	0.516268	1.11186	3.73908	0.597532	1.28688
S2	SMO-01	SMO-01-R1	9.6	0.10534	1.01127	0.697185	0.14943	0.158487	0.689417	0.147765	0.156721
S2	SMO-01	SMO-01-R2	9.6	0.0981073	0.94183	0.61694	0.166319	0.165875	0.655044	0.176592	0.17612
S2	SMO-01	SMO-01-R3	9.6	0.111064	1.06621	0.789918	0.16766	0.193629	0.740865	0.157249	0.181605
S2	SMO-02	SMO-02-R1	12.5	0.0515668	0.644585	7.12909	0.703548	0.938651	11.06	1.09147	1.45621
S2	SMO-02	SMO-02-R2	12.5	0.0518402	0.648002	2.81566	0.243198	1.30937	4.34514	0.375304	2.02063
S2	SMO-02	SMO-02-R3	12.5	0.0520925	0.651157	3.23201	0.187306	1.22986	4.96349	0.287652	1.88873
S2	SMO-02	SMO-02-R4	12.5	0.051041	0.638013	3.23641	0.310143	1.43729	5.07265	0.486109	2.25277
S2	STE-01	STE-01-R1	10.5	0.102107	1.07212	1.69838	0.228165	0.668747	1.58413	0.212817	0.623761
S2	STE-01	STE-01-R2	10.5	0.100796	1.05836	1.80276	0.247581	0.0133083	1.70336	0.23393	0.0125745
S2	STE-01	STE-01-R3	10.5	0.107959	1.13357	1.88189	0.189151	0.078397	1.66014	0.166863	0.0691596
S2	STE-02	STE-02-R1	10.2	0.10663	1.08762	2.82893	0.403029	1.26688	2.60102	0.370559	1.16481
S2	STE-02	STE-02-R2	10.2	0.103938	1.06017	2.47656	1.37177	1.03488	2.336	1.29391	0.976149
S2	STE-02	STE-02-R3	10.2	0.101187	1.03211	3.43346	0.463004	1.05275	3.32664	0.448599	1.01999
S2	STE-03	STE-03-R1	10	0.1	1	3.80076	0.886329	1.66098	3.80076	0.886329	1.66098
S2	STE-03	STE-03-R2	10	0.101125	1.01125	2.27178	0.701662	1.84939	2.24651	0.693857	1.82882
S2	STE-03	STE-03-R3	10	0.110011	1.10011	3.2465	0.773616	1.44428	2.95106	0.703215	1.31285
S2	STE-04	STE-04-R1	10.1	0.100731	1.01739	3.62497	0.890608	1.46927	3.56302	0.875389	1.44417
S2	STE-04	STE-04-R2	10.1	0.100089	1.0109	4.31666	0.429117	1.83271	4.27014	0.424492	1.81296
S2	STE-04	STE-04-R3	10.1	0.100576	1.01582	3.42927	1.09008	1.32202	3.37587	1.07311	1.30144
S2	STE-05	STE-05-R1	10.8	0.108834	1.17541	2.85454	0.484667	1.0832	2.42855	0.412338	0.921547
S2	STE-05	STE-05-R2	10.8	0.0989442	1.0686	2.10196	0.248753	0.876957	1.96703	0.232785	0.820662
S2	STE-05	STE-05-R3	10.8	0.0997414	1.07721	2.64636	0.45903	1.06154	2.45668	0.426129	0.985459
S2	SBG	SBG-R1	10.5	0.0520395	0.546415	5.75831	0.446802	2.20758	10.5383	0.817697	4.04011
S2	SBG	SBG-R2	10.5	0.0540341	0.567358	6.98732	0.575563	2.64962	12.3155	1.01446	4.6701
S2	SBG	SBG-R3	10.5	0.0480144	0.504151	4.20699	0.671635	1.96399	8.3447	1.33221	3.89563
S2	SBG	SBG-R4	10.5	0.0504762	0.53	5.88452	0.405344	3.22036	11.1029	0.7648	6.07615
S2	SBG	SBG-R5	10.5	0.051177	0.537358	4.8638	0.854477	2.61907	9.05131	1.59014	4.87398
S1	STS-01	STS-01-R1	11.1	0.0769184	0.853794	2.19234	0.157026	1.18572	2.56777	0.183915	1.38877
S1	STS-01	STS-01-R2	11.1	0.0785714	0.872143	1.06801	0.172603	1.39599	1.22458	0.197906	1.60065
S1	STS-01	STS-01-R3	11.1	0.0817143	0.907029	1.70625	0.257977	1.36832	1.88114	0.28442	1.50857
S1	STS-01	STS-01-R4	11.1	0.0789388	0.87622	2.13892	0.200167	1.52486	2.44107	0.228444	1.74027
S1	STS-01	STS-01-R5	11.1	0.0771837	0.856739	2.99836	0.234329	3.79262	3.49974	0.273513	4.42681
S1	STS-01	STS-01-R6	11.1	0.0770612	0.85538	2.50248	0.542476	1.17244	2.92558	0.634194	1.37067
S1	STS-01	STS-01-R7	11.1	0.079898	0.886867	1.9662	0.219959	1.01261	2.21702	0.248018	1.14179
S1	STS-01	STS-01-R8	11.1	0.0803469	0.891851	2.01762	0.235334	1.30816	2.26229	0.263871	1.4668
S1	STS-01	STS-01-R9	11.1	0.0773469	0.858551	1.4139	0.611324	1.16504	1.64685	0.712042	1.35699
S1	STS-01	STS-01-R10	11.1	0.0780408	0.866253	2.37414	0.520216	1.64891	2.7407	0.600536	1.9035
S2	STS-02	STS-02-R1	10.1	0.0914993	0.924143	11.793	3.02955	6.90106	12.761	3.27823	7.46752
S2	STS-02	STS-02-R2	10.1	0.0929549	0.938844	10.3296	0.969087	5.03725	11.0024	1.03221	5.36537
S2	STS-02	STS-02-R3	10.1	0.100742	1.0175	11.5921	0.547353	6.50824	11.3927	0.53794	6.39631

## Sheet: FTIR
			POLYMER TYPE
	Sub-sample ID	Sub-sample mass (g)	PE	PP	PS	Others	PET	PVC	PU	ABS	Acrylic	Alkyd	Cellulose acetate	PA	Acrylic fibre	PVAC	Vinyl copolymer	TOTAL
	YCE	12.1	1	6	0	0	0	0	0	0	0	0	0	0	0	0	0	7
	SSM-01	10.4	3	4	0	0	0	0	0	0	0	0	0	0	0	0	0	7
	SSM-02	10.9	20	93	1	4	1	2	0	0	0	0	0	1	0	0	0	122
	EAR	11	54	172	18	19	0	11	3	2	2	0	0	1	0	0	0	282
	SPT-01	12	7	64	1	8	0	4	1	1	1	0	0	1	0	0	0	88
	SPT-02	10.7	6	163	5	18	1	8	2	0	3	0	0	0	1	3	0	210
	SMO-01	9.6	3	9	3	2	0	2	0	0	0	0	0	0	0	0	0	19
	SMO-02	10.8	29	116	8	13	2	4	0	1	5	0	0	0	1	0	0	179
	STE-01	12.5	1	3	0	0	0	0	0	0	0	0	0	0	0	0	0	4
	STE-02	10.4	7	75	1	11	4	5	1	0	0	0	1	0	0	0	0	105
	STE-03	10.2	19	85	9	3	0	0	1	0	2	0	0	0	0	0	0	119
	STE-04	10	9	42	2	9	1	6	2	0	0	0	0	0	0	0	0	71
	STE-05	10.1	25	116	6	19	6	1	1	3	1	0	0	3	0	3	1	185
	SBG	10.5	15	499	12	34	2	18	6	4	4	0	0	0	0	0	0	594
	STS-01	11.1	12	100	15	10	0	10	0	0	0	0	0	0	0	0	0	147
	STS-02	10.1	13	155	18	15	0	11	0	3	1	0	0	0	0	0	0	216
	Total		224	1702	99	165	17	82	17	14	19	0	1	6	2	6	1	2355
		SIZE CLASS								POLYMER SIZE
	Sub-sample ID	[25-50]	[51-100]	[101-150]	[151-300]	[301-500]	[501-5000]	TOTAL			SPT-01	SPT-02	SMO-01	SMO-02	STE-01	STE-02	STE-03	STE-04	STE-05	EAR	YCE	SSM-01	SSM-02	SBG	STS-01	STS-02	Total
	YCE	2	3	1	1	0	0	7		PE
	SSM-01	1	3	1	2	0	0	7		[25-50]	1	0	0	1	0	1	1	1	2	1	1	0	2	0	1	1	13
	SSM-02	10	65	23	17	2	1	118		[51-100]	5	1	1	11	1	4	8	3	14	19	0	1	9	5	3	6	91
	EAR	45	135	42	31	8	2	263		[101-150]	1	2	1	9	0	0	5	3	6	12	0	0	3	1	1	2	46
	SPT-01	13	44	15	7	1	0	80		[151-300]	0	3	1	7	0	1	4	2	2	16	0	2	5	3	4	4	54
	SPT-02	37	94	36	24	1	0	192		[301-500]	0	0	0	1	0	1	1	0	1	4	0	0	0	1	3	0	12
	SMO-01	5	5	2	5	0	0	17		[501-5000]	0	0	0	0	0	0	0	0	0	2	0	0	1	0	0	0	3
	SMO-02	31	96	27	10	2	0	166		PP
	STE-01	0	1	2	0	0	1	4		[25-50]	11	36	3	28	0	13	27	12	41	41	1	1	8	85	18	43	368
	STE-02	18	48	16	9	3	0	94		[51-100]	37	80	3	70	0	41	43	17	64	98	3	2	53	158	63	89	821
	STE-03	29	54	20	12	1	0	116		[101-150]	14	30	1	14	2	15	13	8	7	22	1	1	20	28	13	18	207
	STE-04	16	23	13	9	1	0	62		[151-300]	2	16	2	3	0	6	2	5	4	10	1	0	10	10	6	5	82
	STE-05	51	89	16	9	1	0	166		[301-500]	0	1	0	1	0	0	0	0	0	1	0	0	2	1	0	0	6
	SBG	104	317	98	36	4	1	560		[501-5000]	0	0	0	0	1	0	0	0	0	0	0	0	0	0	0	0	1
	STS-01	22	74	22	15	4	0	137		PS
	STS-02	48	110	28	13	2	0	201		[25-50]	0	1	2	1	0	0	1	1	5	3	0	0	0	1	3	2	20
										[51-100]	0	4	1	6	0	1	1	0	1	10	0	0	1	4	7	12	48
										[101-150]	0	0	0	1	0	0	1	0	0	4	0	0	0	4	3	4	17
										[151-300]	1	0	0	0	0	0	6	1	0	1	0	0	0	0	2	0	11
										[301-500]	0	0	0	0	0	0	0	0	0	0	0	0	0	0	0	0	0
										[501-5000]	0	0	0	0	0	0	0	0	0	0	0	0	0	0	0	0	0

## Sheet: Uncertainties calculations
			Py-GC/MS MASS MEASUREMENTS								Absolute U	Relative U
Sub-sample ID	Py-Aliquote ID	Nb of Aliquotes	PE (μg/g)	PP (μg/g)	PS (μg/g)	Sum PE+PP+PS concentration (µg/g)	Mean concentrations Py-Aliquote (µg/g)	Mean Sub-samples (µg/g)	Standard deviation Py-aliquote (µg/g)	U-aliquote	U Total	U Total (%)
YCE	YCE-R1	3	0.66983	0.172187	0.0776487	0.919666	0.797699	0.797699	0.122328	0.0706261	0.544326	0.68237
YCE	YCE-R2		0.449093	0.164129	0.0617914	0.675013
YCE	YCE-R3		0.469097	0.221947	0.107373	0.798417
SSM-01	SSM-01-R1	3	0.641629	0.191079	0.122147	0.954854	0.800568	1.05729	0.133926	0.0773219	0.545235	0.68106
SSM-01	SSM-01-R2		0.560556	0.138529	0.0334456	0.732531
SSM-01	SSM-01-R3		0.560532	0.133153	0.020635	0.71432
SSM-02	SSM-02-R1	3	0.924969	0.307363	0.12916	1.36149	1.31401		0.161525	0.0932568	0.547722	0.416831						FTIR ITEMS					FTIR MASS ESTIMATION					Py-GC/MS MASS MEASUREMENTS
SSM-02	SSM-02-R2		0.862301	0.179503	0.0922649	1.13407										Sample ID	Sub-sample ID	PE (items/g)	PP (items/g)	PS (items/g)	Total		PE (µg/g)	PP (µg/g)	PS (µg/g)	Total		PE (μg/g)	PP (μg/g)	PS (μg/g)	Total
SSM-02	SSM-02-R3		1.02702	0.3558	0.0636561	1.44648										STE	STE-02	0.673077	7.21154	0.0961538	7.98077		0.846707	1.99536	0.00994115	2.85201		2.75455	0.704357	1.05365	4.51256
EAR	EAR-R1	8	12.8402	2.02389	5.35657	20.2206	21.3276	21.3276	2.37537	0.839819	0.998298	0.0468078				STE	STE-03	1.86275	8.33333	0.882353	11.0784		1.92764	1.38549	1.33641	4.64955		2.99944	0.761134	1.60088	5.36146
EAR	EAR-R2		16.7042	1.44571	6.30418	24.4541										STE	STE-04	0.9	4.2	0.2	5.3		0.683626	1.93709	0.0941894	2.7149		3.73634	0.790996	1.51952	6.04686
EAR	EAR-R3		15.1375	1.73623	6.02213	22.8958										STE	STE-05	2.47525	11.4851	0.594059	14.5545		1.23622	1.37276	0.0268658	2.63584		2.28409	0.357084	0.909223	3.55039
EAR	EAR-R4		11.3829	0.887251	5.67808	17.9483									U-Sub-sample STE 02 to 05						1.99538					0.480901					0.539724
EAR	EAR-R5		16.5593	1.24172	6.5868	24.3879
EAR	EAR-R6		14.2171	1.4856	4.85624	20.559
EAR	EAR-R7		14.9703	1.23838	4.74547	20.9541
EAR	EAR-R8		13.2373	1.21988	4.74401	19.2012
SPT-01	SPT-01-R1	3	2.12786	0.356956	0.281652	2.76647	2.41818	3.88121	0.411329	0.237481	0.589661	0.243845
SPT-01	SPT-01-R2		1.61719	0.249315	0.657196	2.5237
SPT-01	SPT-01-R3		1.31452	0.241949	0.407905	1.96437
SPT-02	SPT-02-R1	4	3.22726	0.42734	1.42636	5.08096	5.34424		0.257917	0.128959	0.554917	0.103835
SPT-02	SPT-02-R2		3.46119	0.448958	1.26464	5.17479
SPT-02	SPT-02-R3		3.36673	0.660699	1.47028	5.49771
SPT-02	SPT-02-R4		3.73908	0.597532	1.28688	5.62349
SMO-01	SMO-01-R1	3	0.689417	0.147765	0.156721	0.993904	1.02713	4.92608	0.0460702	0.0265986	0.540379	0.526108
SMO-01	SMO-01-R2		0.655044	0.176592	0.17612	1.00776
SMO-01	SMO-01-R3		0.740865	0.157249	0.181605	1.07972
SMO-02	SMO-02-R1	4	11.06	1.09147	1.45621	13.6077	8.82503		3.21887	1.60943	1.69752	0.192353
SMO-02	SMO-02-R2		4.34514	0.375304	2.02063	6.74107
SMO-02	SMO-02-R3		4.96349	0.287652	1.88873	7.13987
SMO-02	SMO-02-R4		5.07265	0.486109	2.25277	7.81152
STE-01	STE-01-R1	3	1.58413	0.212817	0.623761	2.42071	2.08891	4.31204	0.288593	0.166619	0.564858	0.270408
STE-01	STE-01-R2		1.70336	0.23393	0.0125745	1.94986
STE-01	STE-01-R3		1.66014	0.166863	0.0691596	1.89617
STE-02	STE-02-R1	3	2.60102	0.370559	1.16481	4.13639	4.51256		0.339227	0.195853	0.574161	0.127236
STE-02	STE-02-R2		2.336	1.29391	0.976149	4.60606
STE-02	STE-02-R3		3.32664	0.448599	1.01999	4.79523
STE-03	STE-03-R1	3	3.80076	0.886329	1.66098	6.34807	5.36146		0.860139	0.496602	0.733427	0.136796
STE-03	STE-03-R2		2.24651	0.693857	1.82882	4.76919
STE-03	STE-03-R3		2.95106	0.703215	1.31285	4.96712
STE-04	STE-04-R1	3	3.56302	0.875389	1.44417	5.88258	6.04686		0.404436	0.233501	0.588069	0.097252
STE-04	STE-04-R2		4.27014	0.424492	1.81296	6.50758
STE-04	STE-04-R3		3.37587	1.07311	1.30144	5.75041
STE-05	STE-05-R1	3	2.42855	0.412338	0.921547	3.76243	3.55039		0.461964	0.266715	0.602029	0.169567
STE-05	STE-05-R2		1.96703	0.232785	0.820662	3.02048
STE-05	STE-05-R3		2.45668	0.426129	0.985459	3.86827
SBG	SBG-R1	3	10.5383	0.817697	4.04011	15.3961	16.0856	16.0856	1.88641	1.08912	1.21552	0.0755655
SBG	SBG-R2		12.3155	1.01446	4.6701	18.0001
SBG	SBG-R3		8.3447	1.33221	3.89563	13.5725
SBG	SBG-R4		11.1029	0.7648	6.07615	17.9438
SBG	SBG-R5		9.05131	1.59014	4.87398	15.5154
STS-01	STS-01-R1	10	2.56777	0.183915	1.38877	4.14045	4.49384	12.1192	1.4568	0.46068	0.709597	0.157904
STS-01	STS-01-R2		1.22458	0.197906	1.60065	3.02313
STS-01	STS-01-R3		1.88114	0.28442	1.50857	3.67413
STS-01	STS-01-R4		2.44107	0.228444	1.74027	4.40979
STS-01	STS-01-R5		3.49974	0.273513	4.42681	8.20006
STS-01	STS-01-R6		2.92558	0.634194	1.37067	4.93044
STS-01	STS-01-R7		2.21702	0.248018	1.14179	3.60682
STS-01	STS-01-R8		2.26229	0.263871	1.4668	3.99296
STS-01	STS-01-R9		1.64685	0.712042	1.35699	3.71587
STS-01	STS-01-R10		2.7407	0.600536	1.9035	5.24474
STS-02	STS-02-R1	3	12.761	3.27823	7.46752	23.5068	19.7446		3.29094	1.90003	1.9752	0.100037
STS-02	STS-02-R2		11.0024	1.03221	5.36537	17.4
STS-02	STS-02-R3		11.3927	0.53794	6.39631	18.327
